# Supplementary material for: A single-cell transcriptome atlas of cell diversity in human prefrontal cortex across the postnatal lifespan
Source: Research Square preprint supplement (doi:10.21203/rs.3.rs-7406880/v1), 2025-09-23
Supplement: Supplementary file 1 [file 06491de0b6744ce3e1c1d6ba.pdf]

**Supplementary Materials for**

**A single-cell transcriptome atlas of cell diversity in human prefrontal cortex across the  
postnatal lifespan**

*Niu et al.*

**This PDF file includes:**

Supplementary Figure. 1 to 6  
Captions of Tables S1 to S5

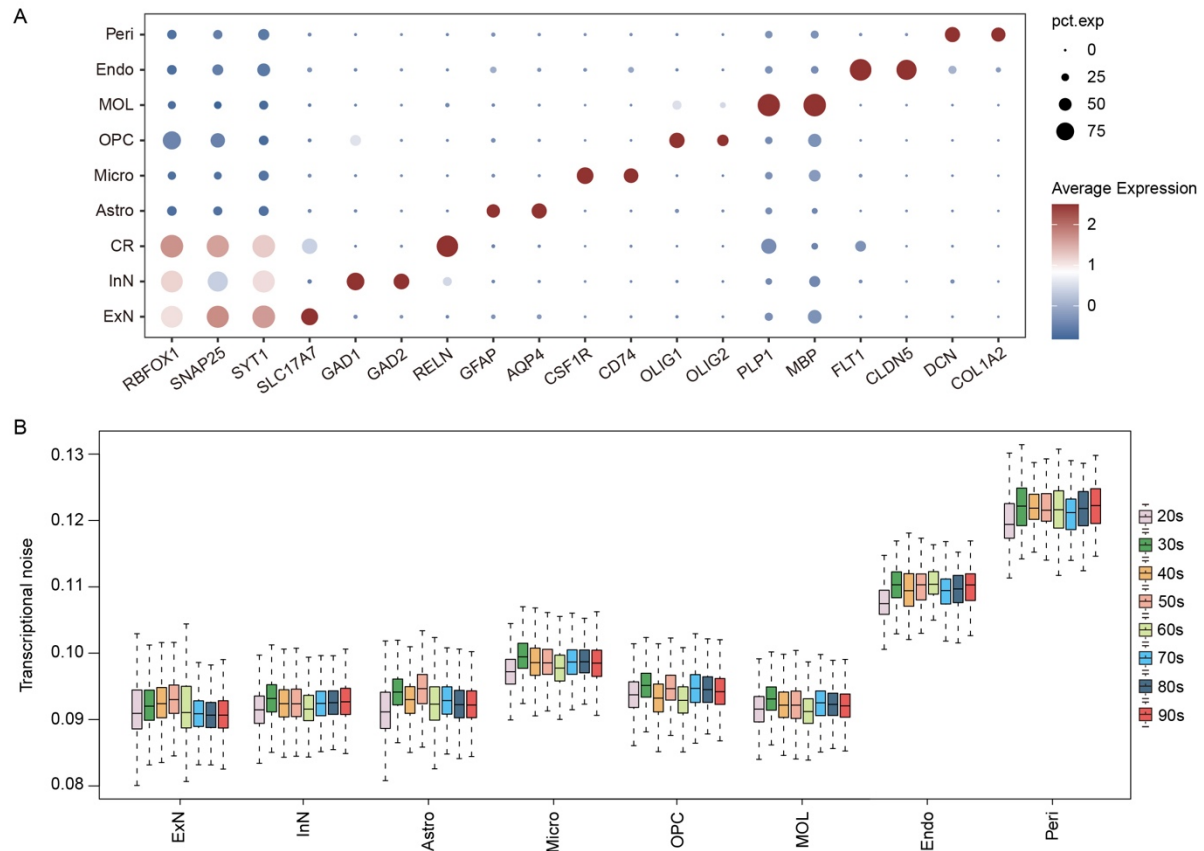

**Supplementary Figure. 1 Cell-specific markers and transcriptional noise analysis.** A. Dot plot demonstrating subtype-specific marker expression patterns. B. Boxplot showing transcriptional noise in different cell types of PFC across the postnatal lifespan

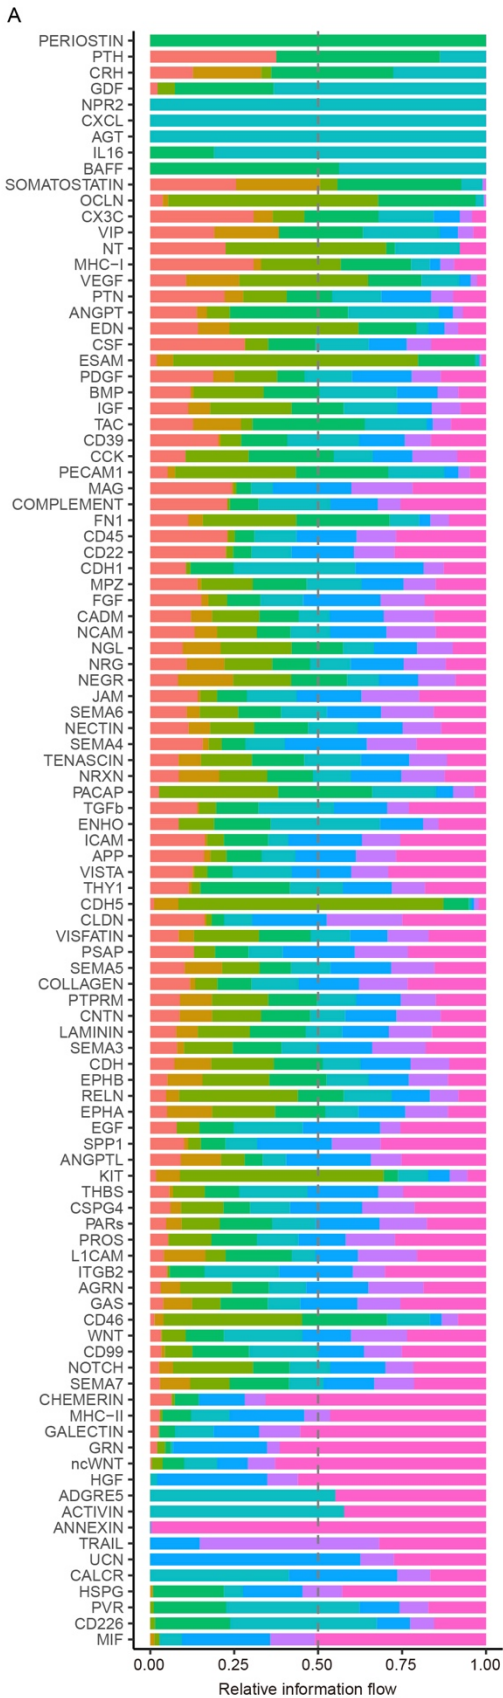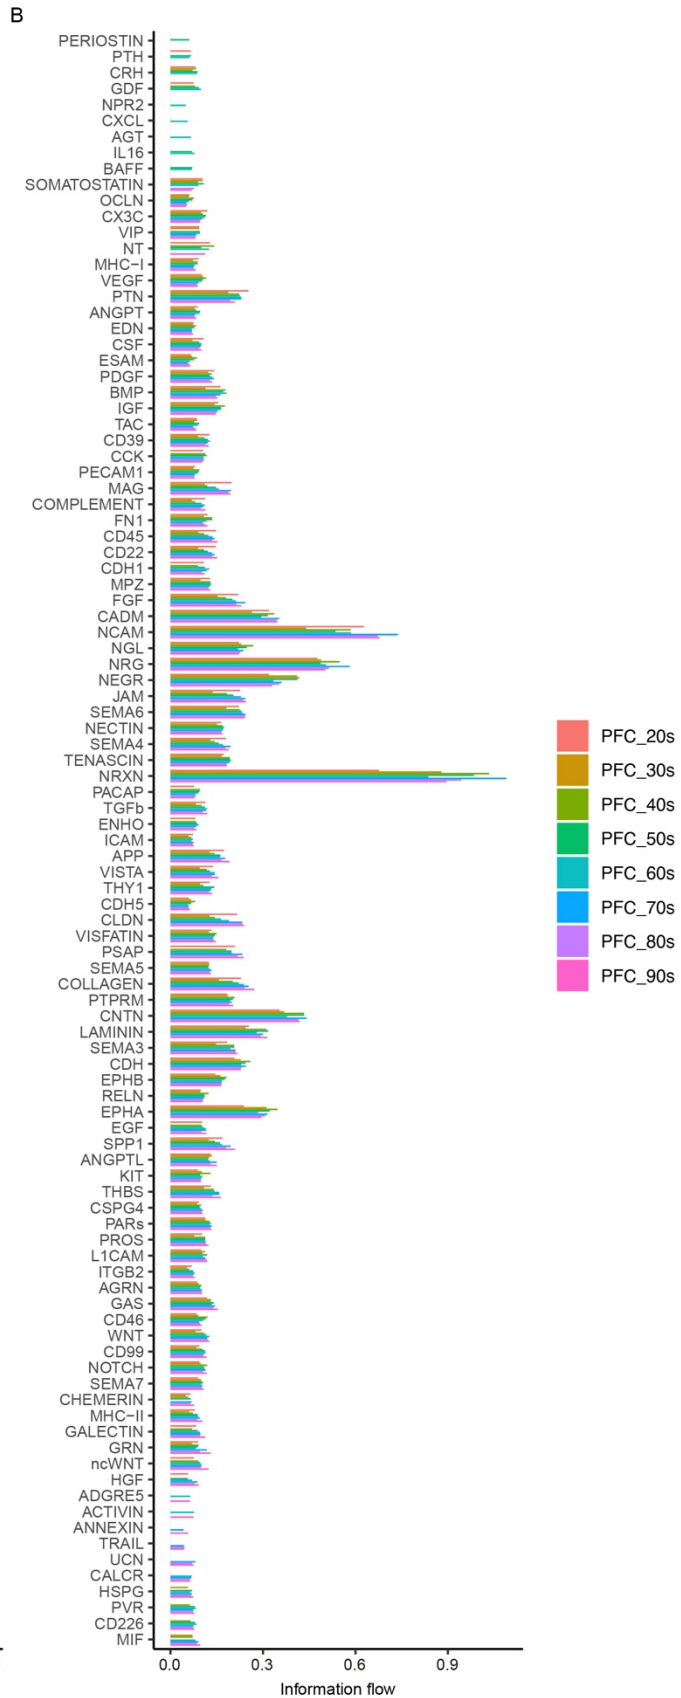

**Supplementary Figure. 2 Comparison of cell communication and signaling pathway across age.** A. The bar chart shows the relative information flow of intercellular interactions in the PFC across various age groups. B. The bar chart presents the strength of information flow of intercellular interactions in the PFC at different ages





**A**

20s 30s 40s 50s 60s 70s 80s 90s

C2 Gene Size: 433

C4 Gene Size: 438

C1 Gene Size: 224

C5 Gene Size: 390

C6 Gene Size: 328

C3 Gene Size: 242

establishment of cell polarity  
cell activation involved in immune response  
regulation of establishment of cell polarity  
leukocyte activation involved in immune response  
regulation of small GTPase mediated signal transduction

myeloid leukocyte activation  
regulation of leukocyte chemotaxis  
leukocyte mediated immunity  
antigen processing and presentation of peptide antigen  
antigen processing and presentation

regulation of leukocyte differentiation  
regulation of hemopoiesis  
regulation of phosphatidylinositol 3-kinase activity  
positive regulation of cell development  
substrate adhesion-dependent cell spreading

positive regulation of GTPase activity  
regulation of GTPase activity  
regulation of small GTPase mediated signal transduction  
activation of GTPase activity  
Ras protein signal transduction

axon development  
regulation of small synaptic transmission  
regulation of trans-synaptic signaling  
axonogenesis  
synapse organization

RNA splicing, via transesterification reactions with bulged adenosine as nucleophile  
mRNA splicing, via spliceosome  
RNA splicing  
RNA splicing via transesterification reactions  
myeloid cell differentiation

**B**

FCGR3A

Antigen processing and presentation FDR = 0.00043  
Ferroptosis FDR = 0.0033  
Intracellular Iron Ion Homeostasis FDR = 0.0085  
Telomere Maintenance Via Telomere Lengthening FDR = 0.013  
Synapse Pruning FDR = 0.018  
Regulation of Tau-Protein Kinase Activity FDR = 0.022  
Regulation of Interleukin-8 Production FDR = 0.029  
Regulation of Programmed Cell Death FDR = 0.03  
Regulation of Leukocyte Migration FDR = 0.037  
Regulation of Endothelial Cell Chemotaxis FDR = 0.041  
Pathways of neurodegeneration FDR = 0.044

**Supplementary Figure. 4 Temporal analysis of DEGs in Micro.** A. Temporal analysis of DEGs in Micro throughout the life course. The left line graph represents the average expression levels and trends of DEGs based on clustering in each age group, the middle heatmap represents the expression levels of DEGs in each cell, and the right side shows the functional enrichment annotations corresponding to the gene clusters (top 5 are displayed). B. The ego-centered graph shows the connections between the KO gene (*FCGR3A*) and significantly perturbed genes (FDR < 0.05). Nodes are color-coded based on the membership of each gene in the enriched functional groups, and only those functional enrichments related to Mendelian disease phenotypes are displayed. C. GSEA analysis identified important gene sets related to perturbed genes.

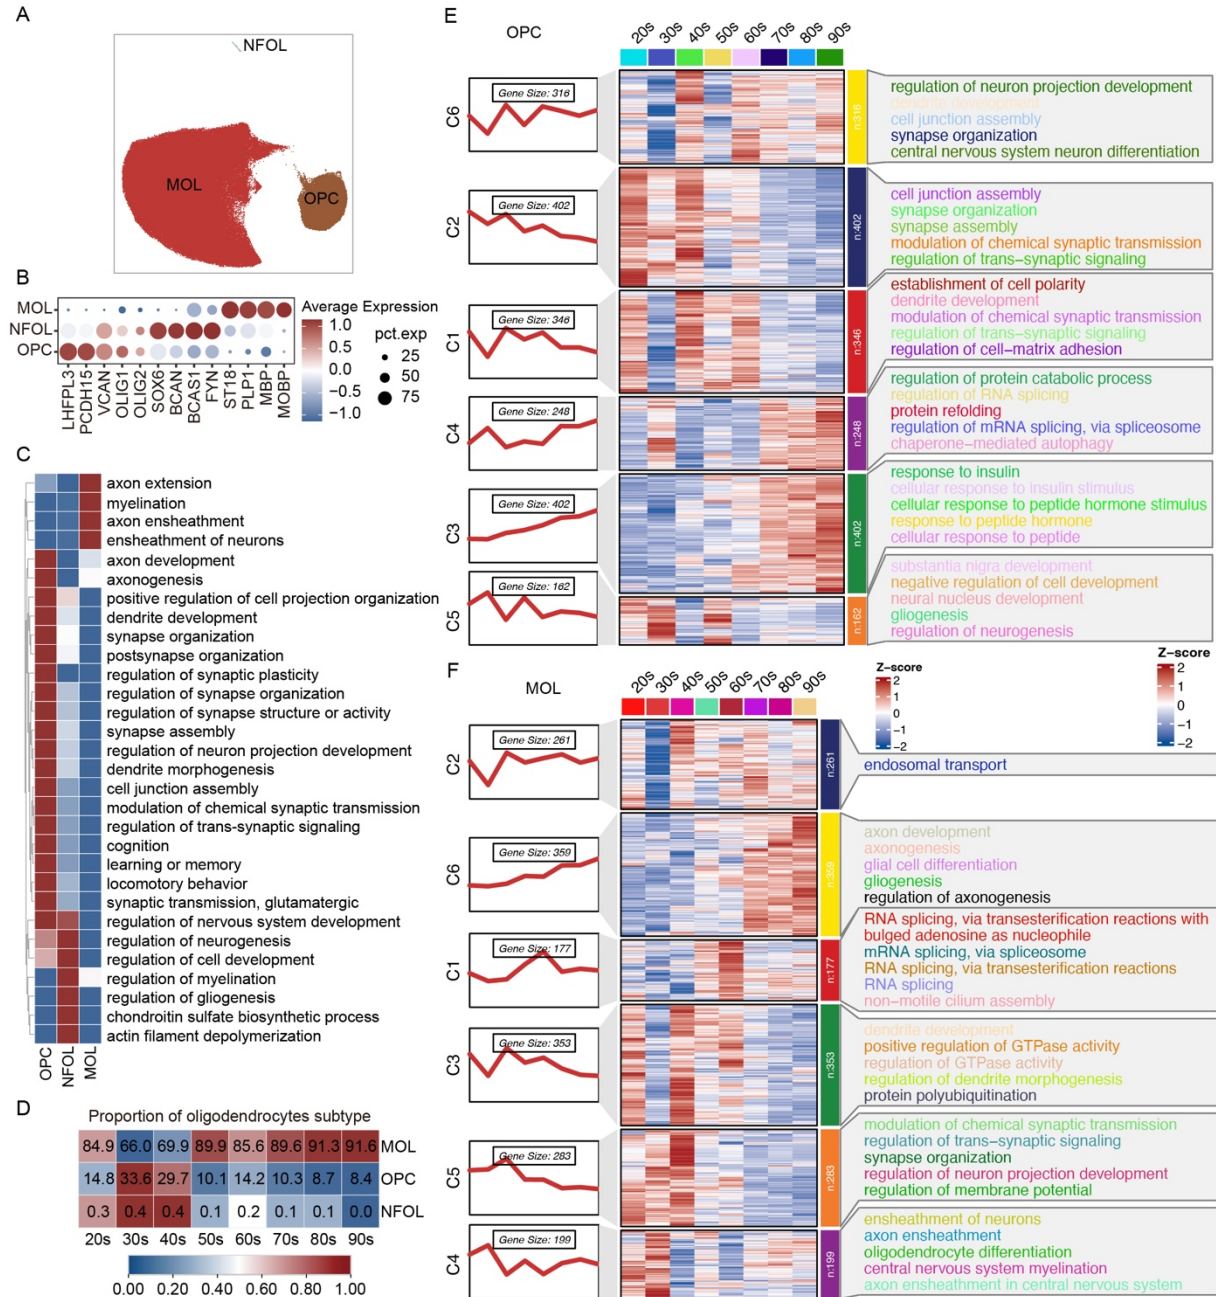

**Supplementary Figure. 5 Temporal analysis of DEGs in OPC and MOL.** A. UMAP visualization of oligodendrocyte lineage. B. Dot plot showing the expression of marker genes in oligodendrocyte lineage subpopulations. C. The biological functions of different oligodendrocyte lineage cells. D. Proportion of oligodendrocyte lineage subpopulations in different groups. E and F respectively present the temporal analysis of DEGs in OPC and MOL throughout the life course. The left line graph represents the average expression level and trend of DEGs based on clustering in each age group, the middle heatmap represents the expression level of DEGs in each cell, and



the right side shows the functional enrichment annotations corresponding to the gene clusters (top 5 are displayed).

A

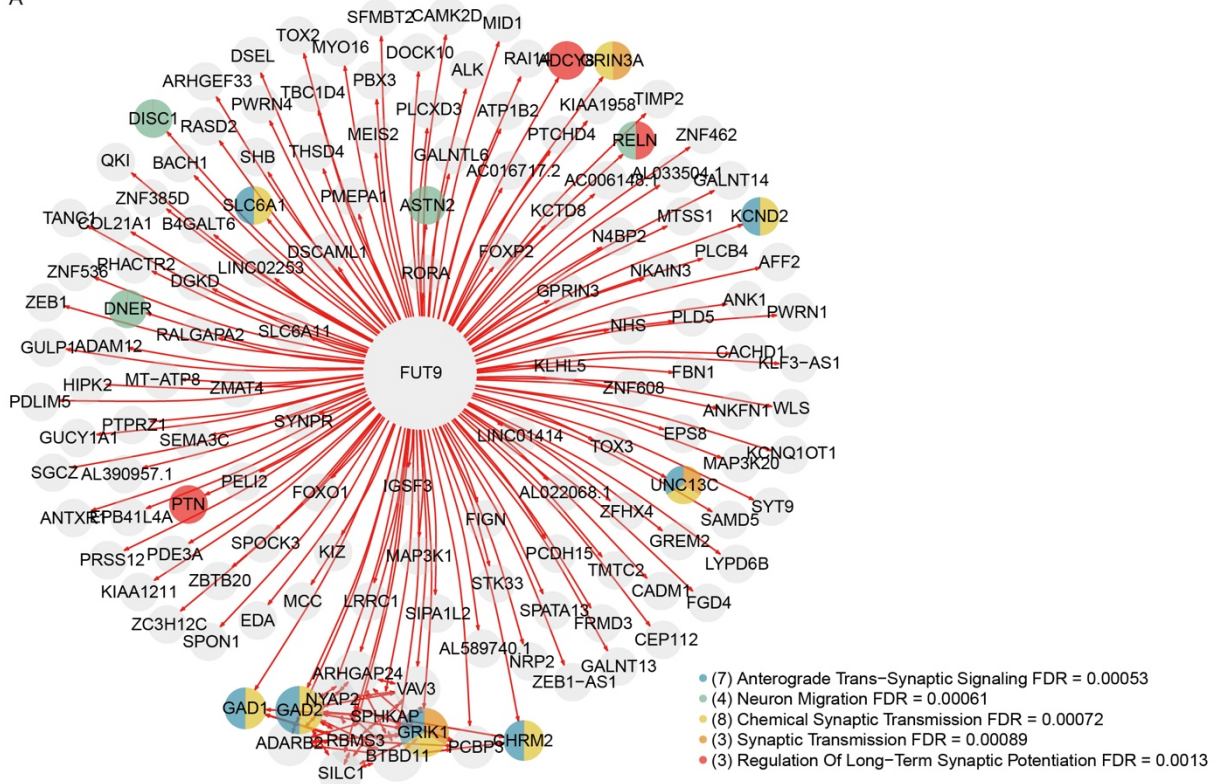

B

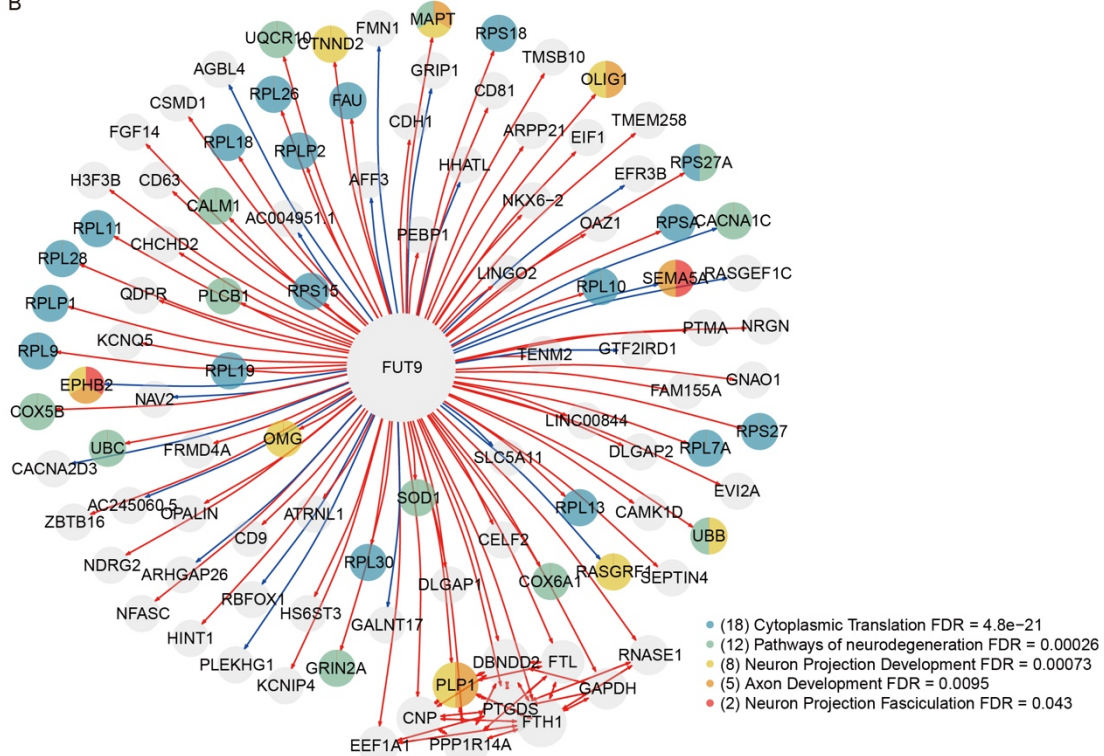

**Supplementary Figure. 6 Virtual KO analysis of FUT9 in ExN and MOL .** A, B. The ego-centered graph shows the connections between the KO gene (*FUT9*) and significantly perturbed genes ( $\text{FDR} < 0.05$ ) in ExN (A) and MOL (B). Nodes are color-coded based on the membership of each gene in the enriched functional groups, and only those functional enrichments related to Mendelian disease phenotypes are displayed. C. GSEA analysis identified important gene sets related to perturbed genes.

## **Supplementary Tables**

### **Supplementary Table 1**

Sample database source and basic information.

### **Supplementary Table 2**

The number of cell for cell type.

### **Supplementary Table 3**

The number of DEG for cell types ( $|\log FC| \geq 0.25$ ,  $FDR < 0.05$ ).

### **Supplementary Table 4**

Genes perturbed by the virtual-KO of FCGR3A in aging Micro ( $FDR < 0.05$ ).

### **Supplementary Table 5**

Genes perturbed by the virtual-KO of FUT9 in aging ExN and MOL ( $FDR < 0.05$ ).
