# Supplementary material for: A single-cell transcriptome atlas of cell diversity in human prefrontal cortex across the postnatal lifespan
Source: Research Square preprint supplement (doi:10.21203/rs.3.rs-7406880/v1), 2025-09-23
Supplement: Supplementary file 1 [file ee28836353b90d7c57624c9f.xlsx]

## Sheet: Supplementary table 1
Supplementary table 1. Sample database source and basic information.
DatabaseID	Reference	Sample_ID	DonorID	Age	Sex	Region	Organ	Race	PMI	others
GSE140231	Agarwal D, Sandor C, Volpato V, Caffrey TM, Monzón-Sandoval J, Bowden R, Alegre-Abarrategui J, Wade-Martins R, Webber C. A single-cell atlas of the human substantia nigra reveals cell-specific pathways associated with neurological disorders. Nat Commun. 2020 Aug 21;11(1):4183. doi: 10.1038/s41467-020-17876-0. PMID: 32826893; PMCID: PMC7442652.	GSM4157073	Sample_11	55	M	PFC	Brain	NA	18
GSE140231		GSM4157077	Sample_15	56	F	PFC	Brain	NA	35
GSE140231		GSM4157071	Sample_9	70	M	PFC	Brain	NA	43
GSE140231		GSM4157075	Sample_13	70	M	PFC	Brain	NA	42
GSE141552	Brenner E, Tiwari GR, Kapoor M, Liu Y, Brock A, Mayfield RD. Single cell transcriptome profiling of the human alcohol-dependent brain. Hum Mol Genet. 2020 May 8;29(7):1144-1153. doi: 10.1093/hmg/ddaa038. PMID: 32142123; PMCID: PMC7206851.	GSM4206903	335	44	M	PFC	Brain	NA	50
GSE141552		GSM4206904	598-1	56	M	PFC	Brain	NA	19
GSE141552		GSM4206905	598-2	56	M	PFC	Brain	NA	19
GSE141552		GSM4206907	777	58	M	PFC	Brain	NA	68
GSE141552		GSM4206906	647	69	M	PFC	Brain	NA	52
GSE144136	Nagy C, Maitra M, Tanti A, Suderman M et al. Single-nucleus transcriptomics of the prefrontal cortex in major depressive disorder implicates oligodendrocyte precursor cells and excitatory neurons. Nat Neurosci 2020 Jun;23(6):771-781. PMID: 32341540	GSM4281975	Control1	39	M	PFC	Brain	White	34.01
GSE144136		GSM4281976	Control2	39	M	PFC	Brain	White	34.01
GSE144136		GSM4281980	Control3	39	M	PFC	Brain	White	34.01
GSE144136		GSM4281982	Control4	39	M	PFC	Brain	White	34.01
GSE144136		GSM4281985	Control5	39	M	PFC	Brain	White	34.01
GSE144136		GSM4281986	Control6	39	M	PFC	Brain	White	34.01
GSE144136		GSM4281988	Control7	39	M	PFC	Brain	White	34.01
GSE144136		GSM4281989	Control8	39	M	PFC	Brain	White	34.01
GSE144136		GSM4281992	Control9	39	M	PFC	Brain	White	34.01
GSE144136		GSM4281993	Control10	39	M	PFC	Brain	White	34.01
GSE144136		GSM4281994	Control11	39	M	PFC	Brain	White	34.01
GSE144136		GSM4281995	Control12	39	M	PFC	Brain	White	34.01
GSE144136		GSM4281997	Control13	39	M	PFC	Brain	White	34.01
GSE144136		GSM4281998	Control14	39	M	PFC	Brain	White	34.01
GSE144136		GSM4282000	Control15	39	M	PFC	Brain	White	34.01
GSE144136		GSM4282002	Control16	39	M	PFC	Brain	White	34.01
GSE144136		GSM4282004	Control17	39	M	PFC	Brain	White	34.01
GSE157827	Lau SF, Cao H, Fu AKY, Ip NY. Single-nucleus transcriptome analysis reveals dysregulation of angiogenic endothelial cells and neuroprotective glia in Alzheimer's disease. Proc Natl Acad Sci U S A 2020 Oct 13;117(41):25800-25809. PMID: 32989152	GSM4775577	NC14	74	F	PFC	Brain	NA	39.5
GSE157827		GSM4775580	NC17	78	M	PFC	Brain	NA	51.5
GSE157827		GSM4775578	NC15	79	F	PFC	Brain	NA	48
GSE157827		GSM4775576	NC12	85	M	PFC	Brain	NA	30.5
GSE157827		GSM4775575	NC11	87	M	PFC	Brain	NA	24
GSE157827		GSM4775579	NC16	89	M	PFC	Brain	NA	54.5
GSE157827		GSM4775574	NC7	90	M	PFC	Brain	NA	5.5
GSE157827		GSM4775573	NC3	93	M	PFC	Brain	NA	34.5
GSE157827		GSM4775581	NC18	94	F	PFC	Brain	NA	29.5
GSE168408	Herring CA, Simmons RK, Freytag S, Poppe D et al. Human prefrontal cortex gene regulatory dynamics from gestation to adulthood at single-cell resolution. Cell 2022 Nov 10;185(23):4428-4447.e28. PMID: 36318921	GSM5138546	RL2128	20	F	PFC	Brain	NA	17
GSE168408		GSM5138547	RL2123	20	F	PFC	Brain	NA	19
GSE168408		GSM5138549	RL2132	25	F	PFC	Brain	NA	24
GSE168408		GSM5138551	RL2124	40	M	PFC	Brain	NA	9
GSE174367	Morabito S, Miyoshi E, Michael N, Shahin S et al. Single-nucleus chromatin accessibility and transcriptomic characterization of Alzheimer's disease. Nat Genet 2021 Aug;53(8):1143-1155. PMID: 34239132	GSM5292839	Sample-50	74	F	PFC	Brain	NA	4.08
GSE174367		GSM5292838	Sample-19	79	M	PFC	Brain	NA	4.42
GSE174367		GSM5292854	Sample-82	79	M	PFC	Brain	NA	5
GSE174367		GSM5292855	Sample-90	79	F	PFC	Brain	NA	4.25
GSE174367		GSM5292856	Sample-96	79	M	PFC	Brain	NA	7
GSE174367		GSM5292851	Sample-52	83	M	PFC	Brain	NA	1.8
GSE174367		GSM5292852	Sample-58	90	M	PFC	Brain	NA	4
GSE174367		GSM5292853	Sample-66	90	F	PFC	Brain	NA	2.92
GSE213982	Maitra M, Mitsuhashi H, Rahimian R, Chawla A et al. Cell type specific transcriptomic differences in depression show similar patterns between males and females but implicate distinct cell types and genes. Nat Commun 2023 May 22;14(1):2912. PMID: 37217515	SRR21678809	GSM6597356	47.89	F	PFC	Brain	NA	30.27
GSE213982		SRR21678806	GSM6597359	47.89	F	PFC	Brain	NA	30.27
GSE213982		SRR21678797	GSM6597368	47.89	F	PFC	Brain	NA	30.27
GSE213982		SRR21678796	GSM6597369	47.89	F	PFC	Brain	NA	30.27
GSE213982		SRR21678795	GSM6597370	47.89	F	PFC	Brain	NA	30.27
GSE213982		SRR21678794	GSM6597371	47.89	F	PFC	Brain	NA	30.27
GSE213982		SRR21678792	GSM6597373	47.89	F	PFC	Brain	NA	30.27
GSE213982		SRR21678789	GSM6597376	47.89	F	PFC	Brain	NA	30.27
GSE213982		SRR21678787	GSM6597378	47.89	F	PFC	Brain	NA	30.27
GSE213982		SRR21678786	GSM6597379	47.89	F	PFC	Brain	NA	30.27
GSE213982		SRR21678785	GSM6597380	47.89	F	PFC	Brain	NA	30.27
GSE213982		SRR21678784	GSM6597381	47.89	F	PFC	Brain	NA	30.27
GSE213982		SRR21678783	GSM6597382	47.89	F	PFC	Brain	NA	30.27
GSE213982		SRR21678782	GSM6597383	47.89	F	PFC	Brain	NA	30.27
GSE213982		SRR21678781	GSM6597384	47.89	F	PFC	Brain	NA	30.27
GSE213982		SRR21678780	GSM6597385	47.89	F	PFC	Brain	NA	30.27
GSE213982		SRR21678779	GSM6597386	47.89	F	PFC	Brain	NA	30.27
GSE213982		SRR21678775	GSM6597390	47.89	F	PFC	Brain	NA	30.27
PMID34582785	Tran MN, Maynard KR, Spangler A, Huuki LA, Montgomery KD, Sadashivaiah V, Tippani M, Barry BK, Hancock DB, Hicks SC, Kleinman JE, Hyde TM, Collado-Torres L, Jaffe AE, Martinowich K. Single-nucleus transcriptome analysis reveals cell-type-specific molecular signatures across reward circuitry in the human brain. Neuron. 2021 Oct 6;109(19):3088-3103.e5. doi: 10.1016/j.neuron.2021.09.001. Epub 2021 S…	Br5212	Br5212	51.63	M	PFC	Brain	White	38.5
PMID34582785		Br5161	Br5161	54.43	M	PFC	Brain	White	21.5
PMID34582785		Br5207	Br5207	61.95	M	PFC	Brain	White	29
PMID36824961		Br6522	Br6522	33.3852	M	PFC	Brain	CAUC	31.5
PMID36824961		Br8667	Br8667	37.3333	F	PFC	Brain	CAUC	13.5
PMID36824961		Br3942	Br3942	47.5346	M	PFC	Brain	CAUC	27.5
PMID36824961		Br2720	Br2720	48.2271	F	PFC	Brain	CAUC	25.5
PMID36824961		Br6432	Br6432	48.88	M	PFC	Brain	CAUC	30.5
PMID36824961		Br6423	Br6423	51.73	M	PFC	Brain	CAUC	18.5
PMID36824961		Br8492	Br8492	53.3989	F	PFC	Brain	CAUC	33.5
PMID36824961		Br6471	Br6471	55.4606	M	PFC	Brain	CAUC	24
PMID36824961		Br8325	Br8325	57.6208	F	PFC	Brain	CAUC	29
PMID36824961		Br2743	Br2743	61.5414	M	PFC	Brain	CAUC	21.5
PRJNA434002	Velmeshev D, Schirmer L, Jung D, Haeussler M, Perez Y, Mayer S, Bhaduri A, Goyal N, Rowitch DH, Kriegstein AR. Single-cell genomics identifies cell type-specific molecular changes in autism. Science. 2019 May 17;364(6441):685-689. doi: 10.1126/science.aav8130. PMID: 31097668; PMCID: PMC7678724.	SRR9262923	5893_PFC_Nova	19	M	PFC	Brain	NA	11
PRJNA434002		SRR9262937	5538_PFC_Nova	19	F	PFC	Brain	NA	24
PRJNA434002		SRR9264385	5893_BA9	19	M	PFC	Brain	NA	11
PRJNA434002		SRR9262956	5577_BA9	21	M	PFC	Brain	NA	19
PRJNA434002		SRR9262938	5958_BA9	22	M	PFC	Brain	NA	24
PRJNA434002		SRR9264383	5546_BA9_Nova	34	F	PFC	Brain	NA	27
PRJNA434002		SRR9264389	5787_BA9_Nova	39	M	PFC	Brain	NA	16
PRJNA434002		SRR9264382	5981_BA9_Nova	44	F	PFC	Brain	NA	19
PRJNA434002		SRR9264388	5609_BA9_Nova	54	F	PFC	Brain	NA	6
PRJNA544731	Schirmer L, Velmeshev D, Holmqvist S, Kaufmann M, Werneburg S, Jung D, Vistnes S, Stockley JH, Young A, Steindel M, Tung B, Goyal N, Bhaduri A, Mayer S, Engler JB, Bayraktar OA, Franklin RJM, Haeussler M, Reynolds R, Schafer DP, Friese MA, Shiow LR, Kriegstein AR, Rowitch DH. Neuronal vulnerability and multilineage diversity in multiple sclerosis. Nature. 2019 Sep;573(7772):75-82. doi: 10.1038/s4…	SRR9123035	C6	34	F	PFC	Brain	NA	27
PRJNA544731		SRR9123036	C7	39	M	PFC	Brain	NA	16
PRJNA544731		SRR9123037	C8	44	F	PFC	Brain	NA	19
PRJNA544731		SRR9123032	C9	54	F	PFC	Brain	NA	6
PRJNA544731		SRR9123040	C2	61	F	PFC	Brain	NA	15
PRJNA544731		SRR9123041	C4	68	M	PFC	Brain	NA	30
syn18485175	Mathys H, Davila-Velderrain J, Peng Z, Gao F, Mohammadi S, Young JZ, Menon M, He L, Abdurrob F, Jiang X, Martorell AJ, Ransohoff RM, Hafler BP, Bennett DA, Kellis M, Tsai LH. Single-cell transcriptomic analysis of Alzheimer's disease. Nature. 2019 Jun;570(7761):332-337. doi: 10.1038/s41586-019-1195-2. Epub 2019 May 1. Erratum in: Nature. 2019 Jul;571(7763):E1. doi: 10.1038/s41586-019-1329-6. PMID…	ROS17	ROS17-10288185	76.8843	M	PFC	Brain	NA	3.25
syn18485175		ROS3	ROS3-20956867	79.1157	F	PFC	Brain	NA	18.2167
syn18485175		ROS15	ROS15-10514454	79.5346	M	PFC	Brain	NA	16.75
syn18485175		ROS13	ROS13-11409232	80.0986	M	PFC	Brain	NA	1.33333
syn18485175		ROS20	ROS20-10102206	80.1807	M	PFC	Brain	NA	22.3333
syn18485175		ROS19	ROS19-10261026	80.9446	M	PFC	Brain	NA	16.6667
syn18485175		ROS12	ROS12-20254740	81.6756	F	PFC	Brain	NA	20.8333
syn18485175		ROS22	ROS22-10101291	83.3977	M	PFC	Brain	NA	7.58333
syn18485175		ROS6	ROS6-20179164	83.729	F	PFC	Brain	NA	5.33333
syn18485175		ROS16	ROS16-10536568	84.9884	M	PFC	Brain	NA	15.1667
syn18485175		ROS21	ROS21-11399871	86.13	M	PFC	Brain	NA	6.5
syn18485175		ROS24	ROS24-11399321	86.9158	M	PFC	Brain	NA	2.33333
syn18485175		ROS9	ROS9-20249897	87.3018	F	PFC	Brain	NA	16.7167
syn18485175		ROS8	ROS8-20275399	87.5099	F	PFC	Brain	NA	3.58333
syn18485175		ROS23	ROS23-11072071	87.9535	M	PFC	Brain	NA	85.0833
syn18485175		ROS14	ROS14-10260309	88.3997	M	PFC	Brain	NA	8.58333
syn18485175		ROS5	ROS5-21142003	88.9254	F	PFC	Brain	NA	7
syn18485175		ROS1	ROS1-20207013	90+	F	PFC	Brain	NA	4.16667
syn18485175		ROS10	ROS10-21126823	90+	F	PFC	Brain	NA	6.28333
syn18485175		ROS11	ROS11-20977678	90+	F	PFC	Brain	NA	3.91667
syn18485175		ROS18	ROS18-11342432	90+	M	PFC	Brain	NA	2.58333
syn18485175		ROS2	ROS2-21412626	90+	F	PFC	Brain	NA	15.3333
syn18485175		ROS4	ROS4-20104101	90+	F	PFC	Brain	NA	4.5
syn18485175		ROS7	ROS7-20149910	90+	F	PFC	Brain	NA	3.25
syn21125841	Zhou Y, Song WM, Andhey PS, Swain A, Levy T, Miller KR, Poliani PL, Cominelli M, Grover S, Gilfillan S, Cella M, Ulland TK, Zaitsev K, Miyashita A, Ikeuchi T, Sainouchi M, Kakita A, Bennett DA, Schneider JA, Nichols MR, Beausoleil SA, Ulrich JD, Holtzman DM, Artyomov MN, Colonna M. Human and mouse single-nucleus transcriptomics reveal TREM2-dependent and TREM2-independent cellular responses in Al…	syn21125841_C5	C5	81.911	F	PFC	Brain	White	3.91667
syn21125841		syn21125841_C1	C1	84.7529	F	PFC	Brain	White	5.75
syn21125841		syn21125841_C2	C2	86.3025	M	PFC	Brain	White	4.5
syn21125841		syn21125841_C6	C6	87.2005	F	PFC	Brain	White	4.56667
syn21125841		syn21125841_C11	C11	87.9535	M	PFC	Brain	White	85.0833
syn21125841		syn21125841_C7	C7	89.2813	F	PFC	Brain	White	5.41667
syn21125841		syn21125841_C8	C8	89.7358	F	PFC	Brain	White	2.75
syn21125841		syn21125841_C12	C12	90.9021	M	PFC	Brain	White	6.91667
syn21125841		syn21125841_C4	C4	93.4018	M	PFC	Brain	White	5.15
syn21125841		syn21125841_C9	C9	96.0164	F	PFC	Brain	White	4.16667
syn21125841		syn21125841_C3	C3	101.09	F	PFC	Brain	White	4.4
syn38120890	Blanchard JW, Akay LA, Davila-Velderrain J, von Maydell D, Mathys H, Davidson SM, Effenberger A, Chen CY, Maner-Smith K, Hajjar I, Ortlund EA, Bula M, Agbas E, Ng A, Jiang X, Kahn M, Blanco-Duque C, Lavoie N, Liu L, Reyes R, Lin YT, Ko T, R'Bibo L, Ralvenius WT, Bennett DA, Cam HP, Kellis M, Tsai LH. APOE4 impairs myelination via cholesterol dysregulation in oligodendrocytes. Nature. 2022 Nov;611…	D19-5991	11615242	71.6605	M	PFC	Brain	White	5.43333
syn38120890		D19-4138	20288196	72.4819	F	PFC	Brain	White	7.5
syn38120890		D19-4114	50500136	75.9945	F	PFC	Brain	White	5.91667
syn38120890		D19-4120	31509843	76.386	M	PFC	Brain	White	4.83333
syn38120890		D19-4119	70625336	81.4976	F	PFC	Brain	White	3.65
syn38120890		D19-4143	20998065	81.859	F	PFC	Brain	White	8.5
syn38120890		D19-4136	20963578	81.911	F	PFC	Brain	White	3.91667
syn38120890		D19-5029	20963578	81.911	F	PFC	Brain	White	3.91667
syn38120890		D19-4140	10100862	84.2163	M	PFC	Brain	White	10.7333
syn38120890		D19-4115	46251007	89.0513	F	PFC	Brain	White	6.11667
syn38120890		D19-4127	16068769	92.0657	M	PFC	Brain	White	8.13333
EGAD00001008287	Palmer CR, Liu CS, Romanow WJ, Lee MH, Chun J. Altered cell and RNA isoform diversity in aging Down syndrome brains. Proc Natl Acad Sci U S A. 2021 Nov 23;118(47):e2114326118. doi: 10.1073/pnas.2114326118. Erratum in: Proc Natl Acad Sci U S A. 2022 Sep 13;119(37):e2212181119. doi: 10.1073/pnas.2212181119. PMID: 34795060; PMCID: PMC8617492.	DSC8	CTLY1	19	F	PFC	Brain	NA	5
EGAD00001008287		DSC12	CTLY2	20	F	PFC	Brain	NA	5
EGAD00001008287		DSC16	CTLY3	20	M	PFC	Brain	NA	5
EGAD00001008287		DSC20	CTLY4	24	M	PFC	Brain	NA	14
EGAD00001008287		DSC28	CTLY6	21	M	PFC	Brain	NA	12
EGAD00001008287		DSC44	CTLY7	35	F	PFC	Brain	NA	2
EGAD00001008287		DSC40	CTLY8	36	M	PFC	Brain	NA	24
EGAD00001008287		DSC14	CTLM1	58	M	PFC	Brain	NA	20
EGAD00001008287		DSC26	CTLM2	60	M	PFC	Brain	NA	16
EGAD00001008287		DSC30	CTLM3	63	M	PFC	Brain	NA	23
EGAD00001008287		DSC34	CTLM4	65	M	PFC	Brain	NA	26
EGAD00001008287		DSC42	CTLM5	57	M	PFC	Brain	NA	10
EGAD00001008287		DSC46	CTLM6	61	F	PFC	Brain	NA	14
EGAD00001008287		DSC47	CTLO1	70	M	PFC	Brain	NA	2.5
EGAD00001008287		DSC51	CTLO2	85	F	PFC	Brain	NA	13.5
EGAD00001008287		DSC53	CTLO3	91	F	PFC	Brain	NA	6
EGAD00001008287		DSC54	CTLO4	94	M	PFC	Brain	NA	5.5
EGAD00001008287		DSC56	CTLO5	74	F	PFC	Brain	NA	3
EGAD00001008287		DSC57	CTLO6	76	F	PFC	Brain	NA	3

## Sheet: Supplementary table 2
Supplementary Table 2: The number of cell for cell typ.
	20s	30s	40s	50s	60s	70s	80s	90s
ExN	16291	31691	28771	30605	13531	29686	37953	21428
InN	5535	11029	10958	9601	5176	11716	12710	6486
CR	0	4	2	1	1	73	3	0
Astro	10668	6317	5840	6224	5075	9099	6940	4950
Micro	4991	1447	1290	1830	1784	3292	3302	3400
OPC	5161	3668	3406	2087	2635	5094	4084	2889
MOL	28996	7056	8379	18017	15322	43016	42021	30806
Endo	555	729	1318	782	299	232	390	208
Peri	175	125	116	133	55	174	142	108
	20s	30s	40s	50s	60s	70s	80s	90s
Astro1	5789	3261	2314	3231	3032	4445	3023	2089
Astro2	2524	1301	951	1328	1356	2181	1464	990
Astro3	321	551	35	26	34	940	1281	1112
Astro4	129	51	1065	17	9	127	82	59
Astro5	55	15	135	14	13	21	12	7
	20s	30s	40s	50s	60s	70s	80s	90s
HM1	2049	566	397	798	574	516	407	341
HM2	404	175	118	264	275	264	217	186
HM3	109	22	36	8	325	1	50	150
ARM1	394	95	306	177	168	1498	1493	1665
ARM2	509	165	43	87	107	401	332	458
CPM	4	1	2	3	1	5	34	41
	20s	30s	40s	50s	60s	70s	80s	90s
LAMP5_NOS1_InN	204	470	346	306	200	447	543	330
SV2C_KIT_InN	289	815	642	510	361	953	999	481
PVALB_SLIT2_InN	1086	2651	1697	2113	1148	2374	2711	1564
PVALB_SST_InN	478	649	643	790	236	307	430	252
SST_InN	1486	2345	1596	2268	1077	2323	2191	1087
CNR1_CCK_InN	191	375	554	334	207	477	519	231
RELN_InN	350	699	984	554	424	801	950	464
VIP_CLAB2_InN1	880	1909	1701	1426	985	2429	2711	1209
VIP_CLAB2_InN2	283	674	754	506	310	692	687	324
	20s	30s	40s	50s	60s	70s	80s	90s
L2_CUX2	5506	11366	9354	7453	5232	12370	16686	8908
L3_5_RORB_PCP4	1248	3195	2508	2460	1238	3972	4785	2724
L3_5_RORB_PLCH1	1253	1995	1425	1622	1145	4268	4709	2584
L3_5_RORB_IL1RAPL2	347	507	401	323	292	738	938	481
L5_IT	336	518	345	295	269	555	697	580
L5_ET	49	151	126	82	60	92	127	101
L5_6_NP	215	547	390	412	284	456	616	354
L6_THEMIS_NFIA	949	1594	1342	974	833	1773	2538	1574
L6b	521	796	951	1025	445	696	1337	694
L6_CT	859	833	688	529	567	695	1055	514
ExN_NRGN	4050	6410	7858	9582	2375	2078	2336	1338

## Sheet: Supplementary table 3
Supplementary Table 3. The number of DEG for cell types (|logFC|≧0.25, FDR<0.05).
celltype	Age	OPC_up	OPC_down	Endo_up	Endo_down	Peri_up	Peri_down	Micro_up	Micro_down	Astro_up	Astro_down	ExN_up	ExN_down	InN_up	InN_down	MOL_up	MOL_down
Age20	20	0	0	0	0	0	0	0	0	0	0	0	0	0	0	0	0
Age30	30	49	-855	25	-30	3	0	53	-131	132	-701	1084	-97	379	-402	42	-793
Age40	40	191	-276	254	-131	24	-3	303	-324	409	-354	892	-141	783	-688	118	-442
Age50	50	142	-477	269	-173	14	-4	213	-225	351	-373	944	-263	173	-337	183	-466
Age60	60	113	-545	18	-37	0	0	125	-244	160	-571	288	-460	157	-518	95	-743
Age70	70	382	-531	206	-204	77	-75	486	-625	489	-592	1364	-327	404	-384	242	-627
Age80	80	434	-468	218	-216	11	-6	616	-610	481	-663	1636	-268	731	-251	290	-504
Age90	90	599	-588	168	-156	17	-25	760	-653	634	-727	1367	-448	698	-371	342	-643

## Sheet: Supplementary table 4
Supplementary Table 4. Genes perturbed by the virtual-KO of FCGR3A in aging Micro (FDR < 0.05).
gene	distance	Z	FC	p.value	p.adj
FCGR3A	0.000228064	6.48398	5.03324e+06	0	0
MT-ATP6	2.92987e-06	3.48163	830.676	1.15546e-182	4.18624e-179
MT-ND3	1.7235e-06	3.14529	287.445	1.79146e-64	4.32696e-61
MT-ND4	1.26277e-06	2.95093	154.306	1.98522e-35	3.59623e-32
GRIN1	1.12522e-06	2.87939	122.522	1.77476e-28	2.57198e-25
ELMO1-AS1	1.066e-06	2.84594	109.963	9.9831e-26	1.20563e-22
FTL	9.99578e-07	2.80623	96.687	8.12008e-23	8.40544e-20
RPS27	9.1049e-07	2.74876	80.2204	3.34884e-19	3.03321e-16
RPLP1	9.01495e-07	2.74265	78.6433	7.44011e-19	5.99011e-16
HSPB1	8.4529e-07	2.70314	69.1427	9.15927e-17	6.63681e-14
TF	8.39109e-07	2.69864	68.1351	1.52667e-16	1.00566e-13
RPS28	8.19847e-07	2.68441	65.043	7.32807e-16	4.42494e-13
HSP90AA1	8.10835e-07	2.67764	63.6208	1.50826e-15	8.4068e-13
TMSB4X	7.95778e-07	2.66617	61.28	4.95093e-15	2.56246e-12
RPL41	7.68011e-07	2.64445	57.0781	4.18846e-14	2.02331e-11
TPT1	7.65916e-07	2.64278	56.7671	4.90603e-14	2.22182e-11
RPS23	7.56249e-07	2.63502	55.3432	1.01217e-13	4.31423e-11
RPL19	7.51952e-07	2.63154	54.7161	1.39261e-13	5.60603e-11
RPL36A	7.50747e-07	2.63056	54.5409	1.52245e-13	5.80614e-11
MEG3	7.41497e-07	2.62299	53.2051	3.0048e-13	1.08864e-10
DNAJB1	7.32884e-07	2.61586	51.9763	5.61753e-13	1.93831e-10
RPL32	7.28938e-07	2.61257	51.4181	7.4649e-13	2.45867e-10
RPL13	7.20814e-07	2.60573	50.2783	1.33416e-12	4.20317e-10
RPL11	7.13747e-07	2.59973	49.2973	2.19963e-12	6.64105e-10
RPS19	7.12348e-07	2.59853	49.1042	2.42718e-12	7.03493e-10
FTH1	7.09969e-07	2.59649	48.7768	2.86812e-12	7.99322e-10
RPL8	6.98439e-07	2.58651	47.2054	6.39248e-12	1.71555e-09
RPS15	6.81433e-07	2.57151	44.9346	2.03724e-11	5.2721e-09
RPLP2	6.80472e-07	2.57065	44.808	2.17332e-11	5.43029e-09
APOE	6.79622e-07	2.56989	44.6961	2.3011e-11	5.43099e-09
RPS25	6.79478e-07	2.56976	44.6772	2.3235e-11	5.43099e-09
RPL14	6.77242e-07	2.56775	44.3836	2.69946e-11	6.11259e-09
TMSB10	6.74425e-07	2.56521	44.0151	3.25854e-11	7.15495e-09
RPL18A	6.66408e-07	2.55794	42.9749	5.54471e-11	1.18167e-08
RPS24	6.64371e-07	2.55608	42.7127	6.34004e-11	1.31257e-08
RPS18	6.63682e-07	2.55545	42.6241	6.63383e-11	1.33524e-08
RPS27A	6.6172e-07	2.55365	42.3724	7.54471e-11	1.47754e-08
RPS2	6.4868e-07	2.54155	40.7188	1.75786e-10	3.35196e-08
RPL36	6.47538e-07	2.54048	40.5757	1.89149e-10	3.51429e-08
HSPH1	6.43516e-07	2.53669	40.0732	2.44622e-10	4.43133e-08
RPS8	6.41328e-07	2.53463	39.8012	2.81177e-10	4.96928e-08
ATP5F1E	6.38328e-07	2.53178	39.4296	3.40107e-10	5.86766e-08
RPL27A	6.27812e-07	2.52169	38.1412	6.58067e-10	1.10892e-07
RPL24	6.25863e-07	2.5198	37.9047	7.42864e-10	1.20784e-07
RPL35	6.25706e-07	2.51965	37.8858	7.50109e-10	1.20784e-07
S100A11	6.18309e-07	2.51244	36.9953	1.18415e-09	1.86529e-07
RPL26	6.16209e-07	2.51037	36.7444	1.34679e-09	2.07635e-07
RPL39	6.14523e-07	2.50871	36.5436	1.4929e-09	2.25366e-07
AIF1	6.09541e-07	2.50377	35.9535	2.02086e-09	2.9884e-07
UBA52	6.0805e-07	2.50229	35.7778	2.21151e-09	3.20493e-07
FAU	6.07537e-07	2.50178	35.7175	2.28109e-09	3.24094e-07
RPL37A	6.00254e-07	2.49447	34.8663	3.53145e-09	4.92094e-07
P4HA1	5.99097e-07	2.4933	34.732	3.7837e-09	5.17297e-07
HSP90AB1	5.93707e-07	2.48782	34.1098	5.20873e-09	6.98935e-07
RPS3	5.92441e-07	2.48653	33.9645	5.61261e-09	7.39436e-07
RPS14	5.88818e-07	2.48281	33.5503	6.94436e-09	8.98551e-07
RPL12	5.78708e-07	2.47233	32.4081	1.24966e-08	1.5886e-06
RPL37	5.72719e-07	2.46603	31.7408	1.76184e-08	2.20108e-06
NACA	5.71917e-07	2.46518	31.652	1.84425e-08	2.26499e-06
HSPA1B	5.6898e-07	2.46207	31.3277	2.17946e-08	2.63206e-06
HSPA1A	5.63754e-07	2.45649	30.7549	2.9276e-08	3.4776e-06
RPL22	5.58728e-07	2.45107	30.209	3.87909e-08	4.53353e-06
UBC	5.57466e-07	2.44971	30.0726	4.16162e-08	4.78652e-06
C1QA	5.52268e-07	2.44405	29.5145	5.5501e-08	6.28376e-06
RPL29	5.49873e-07	2.44142	29.259	6.33222e-08	7.05896e-06
RPL10	5.44469e-07	2.43545	28.6868	8.50829e-08	9.32035e-06
RPL27	5.44234e-07	2.43519	28.662	8.61804e-08	9.32035e-06
GAPDH	5.40081e-07	2.43057	28.2263	1.0793e-07	1.15009e-05
RPS12	5.38997e-07	2.42935	28.1131	1.14431e-07	1.1942e-05
UQCRB	5.38846e-07	2.42918	28.0973	1.15366e-07	1.1942e-05
RPL6	5.34419e-07	2.4242	27.6375	1.46315e-07	1.49324e-05
RPS10	5.34051e-07	2.42379	27.5995	1.49221e-07	1.50174e-05
RPS11	5.33339e-07	2.42298	27.5258	1.55009e-07	1.52765e-05
C1QC	5.33218e-07	2.42284	27.5134	1.56012e-07	1.52765e-05
EEF1A1	5.29528e-07	2.41865	27.1339	1.89836e-07	1.83407e-05
RPL3	5.28322e-07	2.41728	27.0105	2.02356e-07	1.92931e-05
RPS21	5.26214e-07	2.41487	26.7953	2.26184e-07	2.12848e-05
RPS6	5.24703e-07	2.41313	26.6417	2.44901e-07	2.27507e-05
RPL34	5.2412e-07	2.41246	26.5826	2.52511e-07	2.31607e-05
C1QB	5.16881e-07	2.40407	25.8533	3.68383e-07	3.33663e-05
FKBP4	5.15403e-07	2.40235	25.7056	3.97663e-07	3.55737e-05
HAMP	5.0869e-07	2.39444	25.0404	5.61417e-07	4.96101e-05
RPS26	5.0533e-07	2.39045	24.7107	6.66135e-07	5.81544e-05
AC131944.1	5.02288e-07	2.38681	24.4141	7.7698e-07	6.70237e-05
APOC1	5.00046e-07	2.38412	24.1966	8.69841e-07	7.41514e-05
MIF	4.9574e-07	2.37891	23.7817	1.07904e-06	9.09151e-05
CD63	4.93585e-07	2.37629	23.5754	1.20115e-06	0.000100041
RPL28	4.87394e-07	2.36869	22.9876	1.63047e-06	0.000134254
RPL38	4.85953e-07	2.36691	22.8519	1.74975e-06	0.000142457
RPS9	4.81117e-07	2.36089	22.3994	2.21442e-06	0.000178285
SERF2	4.71808e-07	2.34914	21.541	3.46351e-06	0.000275787
RPL7A	4.66267e-07	2.34204	21.038	4.50263e-06	0.000354631
EEF1G	4.64592e-07	2.33988	20.8871	4.87174e-06	0.000379576
PGK1	4.52027e-07	2.32342	19.7726	8.72237e-06	0.000672365
AC011586.2	4.50068e-07	2.32081	19.6016	9.53882e-06	0.000727561
HSPE1	4.49404e-07	2.31993	19.5438	9.83181e-06	0.000742097
RPS4X	4.48744e-07	2.31904	19.4864	1.01319e-05	0.000756863
HSPA6	4.48198e-07	2.31831	19.439	1.03863e-05	0.000767951
RPL23A	4.45094e-07	2.31414	19.1707	1.19534e-05	0.000874895
RPL13A	4.39607e-07	2.3067	18.701	1.52903e-05	0.00110794
HIF1A-AS3	4.39127e-07	2.30605	18.6601	1.56216e-05	0.00112074
ATP5ME	4.37985e-07	2.30449	18.5632	1.64364e-05	0.00116763
CD81	4.35844e-07	2.30155	18.3822	1.80739e-05	0.00127149
TUBA1B	4.29177e-07	2.29231	17.8241	2.42296e-05	0.00168815
GABARAP	4.24553e-07	2.28582	17.4421	2.96196e-05	0.00204404
RPS3A	4.23396e-07	2.28419	17.3471	3.11368e-05	0.00212846
TMA7	4.22589e-07	2.28304	17.2811	3.22385e-05	0.00218318
RPL30	4.1994e-07	2.27928	17.0651	3.61192e-05	0.00242333
HMOX1	4.17165e-07	2.27531	16.8403	4.06605e-05	0.00270299
RPS15A	4.16532e-07	2.2744	16.7892	4.17695e-05	0.00275147
RPL4	4.07713e-07	2.2616	16.0858	6.05349e-05	0.00395167
MT-CO2	4.07453e-07	2.26122	16.0653	6.11938e-05	0.00395902
OAZ1	4.04196e-07	2.25642	15.8095	7.00496e-05	0.00449186
RPS16	4.03947e-07	2.25605	15.7901	7.07729e-05	0.00449842
PTGES3	4.01964e-07	2.25311	15.6354	7.68022e-05	0.0048392
RPL18	3.99003e-07	2.24869	15.4059	8.67186e-05	0.00541692
XACT	3.98347e-07	2.2477	15.3553	8.90721e-05	0.00551638
MTRNR2L12	3.8461e-07	2.22674	14.3145	0.000154669	0.00949772
RPL35A	3.81598e-07	2.22205	14.0912	0.00017416	0.0106047
TSPO	3.80748e-07	2.22072	14.0285	0.000180064	0.0108729
DBI	3.80418e-07	2.2202	14.0042	0.000182405	0.0109232
RPL17	3.79371e-07	2.21856	13.9272	0.00019003	0.0112865
AL050309.1	3.78404e-07	2.21704	13.8562	0.00019734	0.0116254
TOMM7	3.75962e-07	2.21317	13.678	0.000216981	0.0126794
RPS7	3.74035e-07	2.21011	13.5382	0.000233761	0.0135507
ACTB	3.72972e-07	2.20841	13.4613	0.00024353	0.0140049
RPS5	3.70686e-07	2.20475	13.2968	0.000265855	0.0151684
RPL9	3.69498e-07	2.20283	13.2117	0.000278201	0.0157488
UBB	3.66116e-07	2.19735	12.971	0.00031636	0.0177701
PPP1R15A	3.65867e-07	2.19695	12.9533	0.000319357	0.0178005
PFN1	3.62099e-07	2.19078	12.6879	0.000368032	0.0203569
CALR	3.61724e-07	2.19016	12.6616	0.00037324	0.0204886
NME2	3.59638e-07	2.18672	12.516	0.00040348	0.0219821
DNAJA1	3.58445e-07	2.18474	12.4331	0.00042179	0.0228081
RPS13	3.54332e-07	2.17787	12.1494	0.000491027	0.0263554
PFDN5	3.50303e-07	2.17106	11.8747	0.000569026	0.0303174
SYNDIG1	3.5007e-07	2.17067	11.8589	0.000573853	0.0303514
CST3	3.4757e-07	2.1664	11.6901	0.00062832	0.0329914
IER5	3.45482e-07	2.16282	11.5501	0.00067746	0.0353157
YBX1	3.42994e-07	2.15852	11.3843	0.000740662	0.0383346
RASGEF1C	3.41977e-07	2.15675	11.3169	0.000768041	0.0394697
CD14	3.40973e-07	2.15501	11.2506	0.000795993	0.0406181
RPL23	3.38298e-07	2.15032	11.0747	0.000875113	0.0443431

## Sheet: Supplementary table 5
Supplementary Table 5. Genes perturbed by the virtual-KO of FUT9 in aging ExN and MOL (FDR < 0.05).
EXN							MOL
gene	distance	Z	FC	p.value	p.adj		gene	distance	Z	FC	p.value	p.adj
FUT9	0.000160288	7.72422	7.48263e+06	0	0		FUT9	2.15834e-05	8.20625	1.48513e+06	0	0
BTBD11	1.0739e-06	3.49329	335.881	5.03504e-75	2.78614e-71		TENM2	5.97067e-07	4.10619	1136.51	3.84375e-249	1.36838e-245
ADARB2	1.05313e-06	3.47937	323.014	3.19517e-72	1.1787e-68		KCNIP4	4.92565e-07	3.92446	773.486	3.13962e-170	7.45137e-167
GRIK1	1.0491e-06	3.47663	320.545	1.10222e-71	3.04957e-68		RBFOX1	2.44268e-07	3.29029	190.221	2.84438e-43	5.063e-40
ARHGAP24	1.00983e-06	3.44951	296.998	1.48532e-66	3.28761e-63		ATRNL1	1.67669e-07	2.96762	89.6251	2.87847e-21	4.09894e-18
GAD2	9.86485e-07	3.4329	283.423	1.34818e-63	2.48673e-60		AFF3	1.52558e-07	2.88848	74.1981	7.0659e-18	8.38487e-15
VAV3	9.32025e-07	3.39271	252.993	5.78047e-57	9.13893e-54		CD9	1.45708e-07	2.85025	67.6853	1.91793e-16	1.95081e-13
SPHKAP	9.04624e-07	3.37164	238.336	9.06949e-54	1.25465e-50		KCNQ5	1.42149e-07	2.82974	64.4187	1.00597e-15	8.95317e-13
SILC1	8.86189e-07	3.35714	228.721	1.133e-51	1.39321e-48		PLCB1	1.38478e-07	2.8081	61.1346	5.33032e-15	4.21687e-12
GAD1	8.62012e-07	3.33768	216.411	5.48515e-49	6.07041e-46		RASGRF1	1.23897e-07	2.71668	48.938	2.64182e-12	1.88098e-09
PDE3A	8.57191e-07	3.33373	213.998	1.84395e-48	1.85518e-45		AC245060.5	1.23357e-07	2.71311	48.512	3.28272e-12	2.12481e-09
RBMS3	8.47202e-07	3.3255	209.039	2.2257e-47	2.05265e-44		FTH1	1.22664e-07	2.70851	47.9689	4.33029e-12	2.56931e-09
RELN	8.37659e-07	3.31755	204.356	2.34027e-46	1.99229e-43		FAM155A	1.16969e-07	2.66979	43.6183	3.99093e-11	2.1858e-08
PCBP3	8.21459e-07	3.30386	196.529	1.19511e-44	9.44733e-42		FTL	1.15465e-07	2.65928	42.5034	7.05592e-11	3.58844e-08
SLC6A1	8.13976e-07	3.29745	192.964	7.16768e-44	5.28832e-41		RNASE1	1.12011e-07	2.63467	39.9985	2.54159e-10	1.20641e-07
ZFHX4	7.86198e-07	3.27317	180.019	4.80125e-41	3.32097e-38		PTGDS	1.10009e-07	2.62009	38.5818	5.25055e-10	2.33649e-07
MT-ATP8	7.71309e-07	3.25982	173.265	1.43276e-39	9.32728e-37		OPALIN	1.08343e-07	2.60778	37.4221	9.51377e-10	3.98459e-07
DISC1	7.49027e-07	3.23938	163.399	2.04722e-37	1.19437e-34		GTF2IRD1	1.02777e-07	2.56535	33.676	6.50982e-09	2.57499e-06
CHRM2	7.49019e-07	3.23938	163.395	2.05051e-37	1.19437e-34		PLEKHG1	9.68888e-08	2.51815	29.9276	4.48488e-08	1.68065e-05
NYAP2	7.21003e-07	3.21286	151.4	8.56774e-35	4.74096e-32		CNP	9.2296e-08	2.4795	27.1576	1.87531e-07	6.67609e-05
PCDH15	7.20239e-07	3.21212	151.08	1.00683e-34	5.30602e-32		GRIN2A	9.14958e-08	2.47259	26.6887	2.3902e-07	8.03317e-05
BACH1	7.07409e-07	3.19965	145.745	1.4757e-33	7.42342e-31		PLP1	9.13707e-08	2.47151	26.6157	2.48216e-07	8.03317e-05
LYPD6B	6.84053e-07	3.17638	136.28	1.73255e-31	8.33658e-29		EVI2A	8.93692e-08	2.45396	25.4625	4.51075e-07	0.000139637
PWRN4	6.81126e-07	3.17341	135.117	3.11328e-31	1.43561e-28		EPHB2	8.87172e-08	2.44817	25.0923	5.46502e-07	0.000162129
PELI2	6.484e-07	3.13939	122.445	1.84501e-28	8.16747e-26		SLC5A11	8.78331e-08	2.44025	24.5947	7.07471e-07	0.0001987
STK33	6.25208e-07	3.1143	113.842	1.41109e-26	6.00637e-24		HS6ST3	8.76809e-08	2.43888	24.5095	7.39435e-07	0.0001987
FOXO1	5.925e-07	3.07739	102.242	4.91285e-24	2.01372e-21		H3F3B	8.7616e-08	2.4383	24.4732	7.53496e-07	0.0001987
SAMD5	5.85795e-07	3.06959	99.9411	1.56998e-23	6.20533e-21		LINC00844	8.6506e-08	2.42823	23.8571	1.0376e-06	0.000263848
SEMA3C	5.65834e-07	3.04586	93.2464	4.61734e-22	1.76207e-19		PTMA	8.60494e-08	2.42406	23.6059	1.18223e-06	0.000290259
GALNTL6	5.59351e-07	3.03799	91.1218	1.35098e-21	4.94106e-19		DLGAP1	8.5808e-08	2.42184	23.4736	1.26636e-06	0.00030055
COL21A1	5.59204e-07	3.03781	91.0739	1.38405e-21	4.94106e-19		NRGN	8.42824e-08	2.40772	22.6464	1.94726e-06	0.000447243
DNER	5.32864e-07	3.00491	82.6963	9.56808e-20	3.30906e-17		QDPR	8.35961e-08	2.40128	22.279	2.35765e-06	0.000524577
CACHD1	5.1509e-07	2.98183	77.2715	1.49002e-18	4.99699e-16		GNAO1	8.3242e-08	2.39795	22.0907	2.60065e-06	0.000534994
AL033504.1	5.01871e-07	2.96419	73.3564	1.08229e-17	3.52284e-15		AGBL4	8.31713e-08	2.39728	22.0532	2.65193e-06	0.000534994
UNC13C	4.96312e-07	2.95663	71.7403	2.45471e-17	7.7618e-15		OLIG1	8.31451e-08	2.39703	22.0393	2.67124e-06	0.000534994
ZNF608	4.92806e-07	2.95183	70.7304	4.09528e-17	1.25896e-14		GRIP1	8.30996e-08	2.3966	22.0152	2.70502e-06	0.000534994
AL390957.1	4.84991e-07	2.94101	68.5048	1.26569e-16	3.78579e-14		FGF14	8.22052e-08	2.3881	21.5438	3.45833e-06	0.000665495
TANC1	4.83672e-07	2.93916	68.1326	1.52863e-16	4.45194e-14		RPS27A	8.09023e-08	2.37557	20.8663	4.92473e-06	0.000922738
ADCY8	4.76368e-07	2.92888	66.0905	4.30692e-16	1.22217e-13		AC004951.1	7.93345e-08	2.36025	20.0654	7.48367e-06	0.00133143
DOCK10	4.74146e-07	2.92572	65.4753	5.88468e-16	1.62814e-13		CELF2	7.93312e-08	2.36022	20.0638	7.49014e-06	0.00133143
PWRN1	4.72174e-07	2.9229	64.9317	7.75378e-16	2.09295e-13		GAPDH	7.9243e-08	2.35935	20.0192	7.66694e-06	0.00133143
PBX3	4.70572e-07	2.92061	64.4921	9.69201e-16	2.55384e-13		RPS27	7.89945e-08	2.35689	19.8938	8.18647e-06	0.0013878
RALGAPA2	4.44128e-07	2.88162	57.4473	3.47149e-14	8.93466e-12		RPL9	7.83327e-08	2.35032	19.5619	9.73929e-06	0.00161264
GRIN3A	4.3688e-07	2.87056	55.5876	8.9386e-14	2.24826e-11		RPL7A	7.794e-08	2.34639	19.3662	1.07898e-05	0.00174599
FIGN	4.31513e-07	2.86226	54.2303	1.78316e-13	4.38539e-11		MAPT	7.77165e-08	2.34415	19.2553	1.1435e-05	0.00180926
AL022068.1	4.29141e-07	2.85855	53.6357	2.41337e-13	5.80626e-11		NKX6-2	7.74029e-08	2.34099	19.1002	1.2403e-05	0.00190529
TOX3	4.27022e-07	2.85523	53.1072	3.15826e-13	7.43668e-11		RPL13	7.73061e-08	2.34002	19.0525	1.27171e-05	0.00190529
ANK1	4.24524e-07	2.8513	52.4879	4.32915e-13	9.9814e-11		OAZ1	7.72674e-08	2.33963	19.0335	1.28446e-05	0.00190529
NHS	4.2375e-07	2.85007	52.2965	4.77214e-13	1.07782e-10		NAV2	7.69173e-08	2.33608	18.8614	1.40571e-05	0.00204259
ZEB1-AS1	4.22523e-07	2.84813	51.9942	5.56648e-13	1.23208e-10		ARPP21	7.66838e-08	2.33371	18.747	1.49258e-05	0.00212544
MAP3K20	4.21613e-07	2.84668	51.7705	6.23823e-13	1.3537e-10		RPLP1	7.65622e-08	2.33248	18.6876	1.53981e-05	0.0021497
SPON1	4.1498e-07	2.83606	50.1542	1.42127e-12	3.02485e-10		EEF1A1	7.61257e-08	2.32802	18.4751	1.72136e-05	0.00235693
GREM2	4.14779e-07	2.83573	50.1058	1.45677e-12	3.04191e-10		FMN1	7.56073e-08	2.3227	18.2243	1.96354e-05	0.00263781
PDLIM5	4.12647e-07	2.83228	49.5919	1.89291e-12	3.87942e-10		EIF1	7.55297e-08	2.3219	18.187	2.00245e-05	0.00264027
ARHGEF33	4.1206e-07	2.83133	49.4509	2.03403e-12	4.09284e-10		PEBP1	7.41843e-08	2.30792	17.5448	2.80615e-05	0.0036327
GUCY1A1	4.1024e-07	2.82836	49.015	2.54019e-12	5.02005e-10		NFASC	7.40034e-08	2.30602	17.4593	2.93518e-05	0.00373187
N4BP2	4.02939e-07	2.81635	47.2858	6.13539e-12	1.19123e-09		UBB	7.30296e-08	2.29574	17.0029	3.73232e-05	0.00466212
AC016717.2	3.99349e-07	2.81038	46.4472	9.41199e-12	1.79591e-09		TMSB10	7.19452e-08	2.28414	16.5017	4.86068e-05	0.00596691
KIAA1958	3.96985e-07	2.80641	45.8989	1.24517e-11	2.33564e-09		HHATL	7.11066e-08	2.27506	16.1192	5.94773e-05	0.0071776
THSD4	3.88802e-07	2.79251	44.0262	3.24006e-11	5.97629e-09		CSMD1	7.09978e-08	2.27388	16.07	6.1045e-05	0.007244
PTN	3.87832e-07	2.79084	43.8067	3.62466e-11	6.57609e-09		UBC	7.05521e-08	2.269	15.8688	6.78879e-05	0.00792396
EDA	3.81486e-07	2.77985	42.3849	7.49651e-11	1.33813e-08		CD81	7.0408e-08	2.26742	15.8041	7.0251e-05	0.00806754
SIPA1L2	3.81294e-07	2.77952	42.3423	7.66186e-11	1.34593e-08		CDH1	6.95291e-08	2.25772	15.412	8.64397e-05	0.00976906
RAI14	3.80597e-07	2.7783	42.1876	8.29226e-11	1.43391e-08		CAMK1D	6.9077e-08	2.25268	15.2122	9.6082e-05	0.0106891
RORA	3.79297e-07	2.77602	41.8999	9.6066e-11	1.63564e-08		DBNDD2	6.89993e-08	2.25181	15.178	9.78385e-05	0.0107171
SYNPR	3.73696e-07	2.76612	40.6715	1.80097e-10	3.01991e-08		HINT1	6.8604e-08	2.24738	15.0046	0.000107251	0.0115701
ZEB1	3.7286e-07	2.76463	40.4897	1.97652e-10	3.2648e-08		RPL18	6.81912e-08	2.24273	14.8245	0.000117991	0.0125387
KCND2	3.70518e-07	2.76044	39.9828	2.5621e-10	4.16981e-08		RPS15	6.7532e-08	2.23525	14.5393	0.000137265	0.0143725
ZNF385D	3.6974e-07	2.75904	39.815	2.79195e-10	4.47805e-08		SEPTIN4	6.73496e-08	2.23316	14.4609	0.000143102	0.0147665
ALK	3.65772e-07	2.75187	38.965	4.31473e-10	6.82159e-08		RPL11	6.72371e-08	2.23188	14.4126	0.000146814	0.0149331
FRMD3	3.63097e-07	2.747	38.3972	5.77158e-10	8.99635e-08		FAU	6.69867e-08	2.22901	14.3055	0.000155413	0.0155851
TMTC2	3.59653e-07	2.74067	37.6721	8.36928e-10	1.28643e-07		CALM1	6.67267e-08	2.22602	14.1946	0.000164841	0.0161414
EPS8	3.59018e-07	2.7395	37.5394	8.95868e-10	1.35816e-07		FRMD4A	6.67092e-08	2.22581	14.1872	0.000165495	0.0161414
GALNT14	3.56234e-07	2.73434	36.9594	1.20613e-09	1.80382e-07		SEMA5A	6.6538e-08	2.22384	14.1145	0.000172016	0.0165507
PLCXD3	3.50786e-07	2.72413	35.8375	2.14479e-09	3.16485e-07		RPL28	6.64253e-08	2.22253	14.0667	0.000176442	0.0167502
ANKFN1	3.4756e-07	2.71801	35.1813	3.00387e-09	4.37418e-07		NDRG2	6.59226e-08	2.2167	13.8546	0.000197515	0.018504
WLS	3.46048e-07	2.71512	34.8759	3.51396e-09	5.05053e-07		EFR3B	6.56721e-08	2.21377	13.7495	0.000208878	0.0193145
GALNT13	3.42833e-07	2.70895	34.231	4.89428e-09	6.94423e-07		CTNND2	6.54869e-08	2.21161	13.672	0.000217671	0.0198695
SPATA13	3.39788e-07	2.70305	33.6256	6.68071e-09	9.35892e-07		RASGEF1C	6.53594e-08	2.21011	13.6189	0.000223922	0.0199318
AC006148.1	3.38848e-07	2.70122	33.4397	7.35066e-09	1.01687e-06		CD63	6.53588e-08	2.2101	13.6186	0.000223953	0.0199318
ADAM12	3.31149e-07	2.68604	31.9375	1.5921e-08	2.17529e-06		ARHGAP26	6.45757e-08	2.20086	13.2942	0.000266224	0.0234014
PRSS12	3.30802e-07	2.68535	31.8706	1.64791e-08	2.22407e-06		LINGO2	6.44799e-08	2.19972	13.2548	0.000271881	0.0236072
NRP2	3.27781e-07	2.6793	31.2911	2.22098e-08	2.96139e-06		RPL10	6.3915e-08	2.19298	13.0236	0.000307595	0.0263864
MTSS1	3.23315e-07	2.67026	30.4443	3.43592e-08	4.4889e-06		DLGAP2	6.37763e-08	2.19131	12.9671	0.000317011	0.0268705
SPOCK3	3.2328e-07	2.67019	30.4377	3.4477e-08	4.4889e-06		CACNA2D3	6.35245e-08	2.18829	12.8649	0.000334798	0.0280443
SGCZ	3.20284e-07	2.66406	29.8761	4.60544e-08	5.92656e-06		UQCR10	6.34526e-08	2.18742	12.8358	0.000340046	0.0281527
FOXP2	3.15949e-07	2.65509	29.0728	6.9708e-08	8.86734e-06		RPS18	6.28634e-08	2.18028	12.5985	0.000386047	0.0314486
MEIS2	3.1495e-07	2.65301	28.8893	7.66343e-08	9.63764e-06		GALNT17	6.28316e-08	2.1799	12.5858	0.000388691	0.0314486
PTPRZ1	3.13773e-07	2.65054	28.6737	8.56595e-08	1.06516e-05		COX5B	6.27327e-08	2.17869	12.5462	0.000397011	0.0317609
DSEL	3.10987e-07	2.64468	28.1668	1.113e-07	1.36862e-05		RPL19	6.2571e-08	2.17672	12.4816	0.00041098	0.0322156
B4GALT6	3.07995e-07	2.63833	27.6275	1.47076e-07	1.78867e-05		RPL30	6.25622e-08	2.17661	12.4781	0.000411745	0.0322156
KLF3-AS1	3.06991e-07	2.63619	27.4476	1.61407e-07	1.92702e-05		CHCHD2	6.24606e-08	2.17537	12.4376	0.000420774	0.0325642
PLD5	3.06956e-07	2.63611	27.4413	1.61934e-07	1.92702e-05		RPL26	6.23706e-08	2.17427	12.4018	0.000428924	0.0326937
IGSF3	3.05064e-07	2.63205	27.1041	1.9279e-07	2.26269e-05		SOD1	6.2341e-08	2.17391	12.39	0.00043163	0.0326937
ZC3H12C	3.04983e-07	2.63188	27.0897	1.94231e-07	2.26269e-05		CACNA1C	6.21325e-08	2.17135	12.3073	0.000451193	0.0338158
CAMK2D	3.0473e-07	2.63133	27.0449	1.98788e-07	2.29165e-05		RPSA	6.14918e-08	2.16343	12.0548	0.000516597	0.0383143
PLCB4	2.94685e-07	2.60936	25.2912	4.92941e-07	5.6241e-05		RPLP2	6.13581e-08	2.16177	12.0024	0.000531323	0.0390002
SLC6A11	2.89105e-07	2.59685	24.3425	8.06403e-07	9.1066e-05		PPP1R14A	6.09152e-08	2.15625	11.8298	0.000582911	0.0423503
LINC02253	2.85579e-07	2.58883	23.7523	1.09563e-06	0.000122344		TMEM258	6.06985e-08	2.15353	11.7458	0.000609823	0.043858
PHACTR2	2.85475e-07	2.5886	23.7351	1.10549e-06	0.000122344		COX6A1	6.04659e-08	2.15061	11.6559	0.000639997	0.0455678
QKI	2.85285e-07	2.58816	23.7035	1.1238e-06	0.000123139		OMG	6.02227e-08	2.14754	11.5623	0.000673011	0.0474439
EPB41L4A	2.79255e-07	2.57421	22.7121	1.88181e-06	0.000204176		ZBTB16	6.00293e-08	2.14509	11.4882	0.000700397	0.0488904
LRRC1	2.73172e-07	2.55985	21.7332	3.13316e-06	0.000336648
TIMP2	2.69517e-07	2.55108	21.1556	4.23467e-06	0.000450626
KCNQ1OT1	2.58964e-07	2.52512	19.5313	9.89653e-06	0.00104309
ATP1B2	2.55309e-07	2.51589	18.9839	1.31825e-05	0.00137632
PMEPA1	2.52437e-07	2.50856	18.5592	1.64705e-05	0.00170354
MAP3K1	2.50348e-07	2.50317	18.2534	1.93384e-05	0.00196524
NKAIN3	2.50337e-07	2.50314	18.2517	1.93558e-05	0.00196524
ZNF462	2.50168e-07	2.50271	18.2271	1.96069e-05	0.00197263
SHB	2.47511e-07	2.49579	17.8419	2.40034e-05	0.0023932
LINC01414	2.46742e-07	2.49378	17.7313	2.54402e-05	0.00251381
KLHL5	2.45031e-07	2.48928	17.4861	2.8941e-05	0.00283442
KIAA1211	2.44416e-07	2.48765	17.3985	3.03057e-05	0.00294205
ANTXR1	2.36712e-07	2.46696	16.319	5.35245e-05	0.00515092
RASD2	2.35714e-07	2.46424	16.1817	5.7546e-05	0.00549018
AL589740.1	2.32694e-07	2.45592	15.7698	7.15368e-05	0.00676665
AFF2	2.31651e-07	2.45303	15.6287	7.70757e-05	0.00722879
MID1	2.31344e-07	2.45217	15.5873	7.87838e-05	0.00732689
DGKD	2.28614e-07	2.44452	15.2216	9.56057e-05	0.00881723
GPRIN3	2.27702e-07	2.44195	15.1004	0.000101943	0.00932395
TOX2	2.27579e-07	2.4416	15.0841	0.000102827	0.00932778
SYT9	2.27438e-07	2.4412	15.0654	0.000103852	0.00934413
CEP112	2.25806e-07	2.43657	14.85	0.00011641	0.0103896
GULP1	2.24445e-07	2.43268	14.6714	0.000127974	0.0113303
FBN1	2.23203e-07	2.42911	14.5096	0.000139447	0.0122481
KCTD8	2.21745e-07	2.4249	14.3206	0.000154165	0.0134342
MYO16	2.21414e-07	2.42394	14.2779	0.000157708	0.0136356
ZMAT4	2.18603e-07	2.41574	13.9177	0.000190996	0.0163857
CADM1	2.17066e-07	2.41121	13.7226	0.000211891	0.0180385
ASTN2	2.14763e-07	2.40437	13.433	0.000247238	0.0208869
ZBTB20	2.1368e-07	2.40112	13.2978	0.000265712	0.0222775
DSCAML1	2.11401e-07	2.39425	13.0157	0.000308896	0.0257034
FGD4	2.1046e-07	2.3914	12.9001	0.000328567	0.0271362
ZNF536	2.10263e-07	2.3908	12.876	0.000332825	0.0272842
PTCHD4	2.09946e-07	2.38983	12.8371	0.000339812	0.0276522
SFMBT2	2.09201e-07	2.38755	12.7462	0.000356737	0.0288176
MCC	2.05173e-07	2.37512	12.2601	0.000462743	0.03711
HIPK2	2.03361e-07	2.36945	12.0446	0.000519437	0.0413569
TBC1D4	2.02552e-07	2.3669	11.9489	0.000546811	0.0432254
KIZ	2.01258e-07	2.36281	11.7967	0.000593367	0.046573
